# Supplementary material for: CoOOH/CdIn2S4 film photoanodes driving unbiased tandem cells towards simultaneous efficient oxidation of benzyl alcohol and selective generation of ethanol from CO2 reduction
Source: Royal Society of Chemistry journal article supplement (doi:10.1039/d4ta03771e), 2024-01-01
Supplement: d4ta03771e1.pdf [file d4ta03771e1.pdf]

*Electronic Supplementary Information*

**CoOOH/CdIn<sub>2</sub>S<sub>4</sub> Film Photoanodes Driving Unbiased Tandem Cells towards Simultaneously Efficient Oxidation of Benzyl Alcohol and Selective Generation of Ethanol from CO<sub>2</sub> Reduction**

Yiqing Wei,<sup>a</sup> Huichao He,<sup>b\*</sup> Shuyuan Yang,<sup>c</sup> Yongcai Zhang,<sup>d</sup> Xin Zhou,<sup>c\*</sup> Zhigang Zou<sup>a, e</sup> and Yong Zhou<sup>a, e, f\*</sup>

<sup>a</sup>National Laboratory of Solid-State Microstructures, Collaborative Innovation Center of Advanced Microstructures, School of Physics, Jiangsu Key Laboratory of Nanotechnology, Eco-materials and Renewable Energy Research Center (ERERC), Nanjing University, Nanjing, 210093, Jiangsu, P. R. China.

<sup>b</sup>School of Metallurgy and Materials Engineering, Chongqing University of Science and Technology, Chongqing 401331, P. R. China.

<sup>c</sup>College of Environment and Chemical Engineering, Dalian University, Dalian, 116622, Liaoning, P. R. China.

<sup>d</sup>School of Chemistry and Chemical Engineering, Yangzhou University, Yangzhou 225009, P. R. China.

<sup>e</sup>School of Science and Engineering, The Chinese University of Hongkong (Shenzhen), Shenzhen, Guangdong 518172, P. R. China.

<sup>f</sup>School of Chemical and Environmental Engineering, Anhui Polytechnic University, Wuhu 241000, P. R. China.

\*Corresponding authors.

zhouyong1999@nju.edu.cn (Y. Zhou)

hehuichao@cqust.edu.cn (H. Chao)

zhouxin@dlu.edu.cn (X. Zhou)

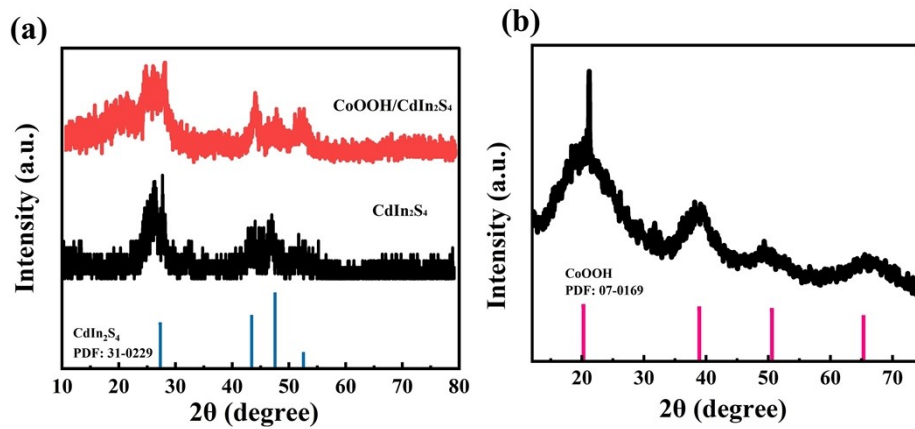

Fig. S1 The XRD patterns of (a) CdIn<sub>2</sub>S<sub>4</sub> and CoOOH/CdIn<sub>2</sub>S<sub>4</sub>, (b) CoOOH.

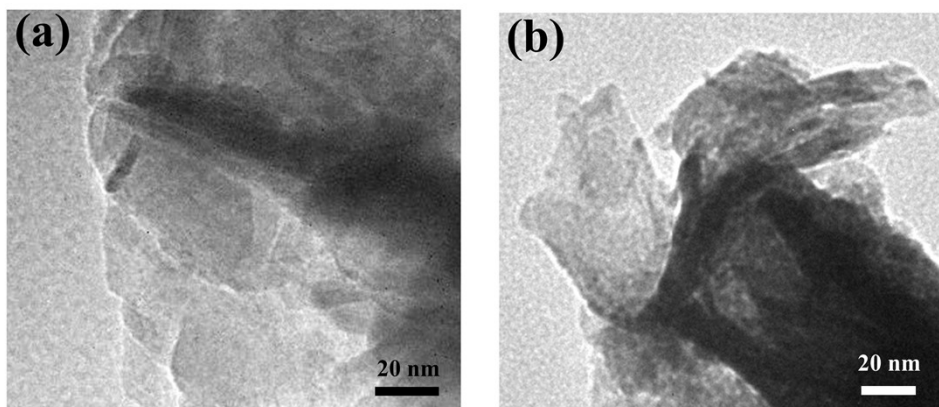

**Fig. S2** TEM image of CdIn<sub>2</sub>S<sub>4</sub> and CoOOH/CdIn<sub>2</sub>S<sub>4</sub>.

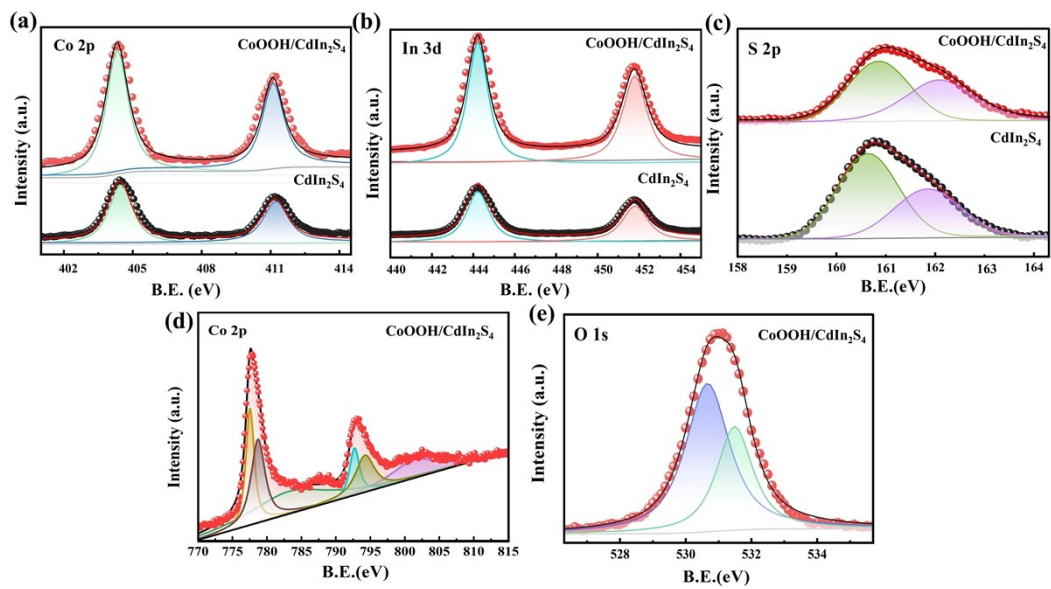

**Fig. S3** XPS data collected from the CoOOH/CdIn<sub>2</sub>S<sub>4</sub> sample.

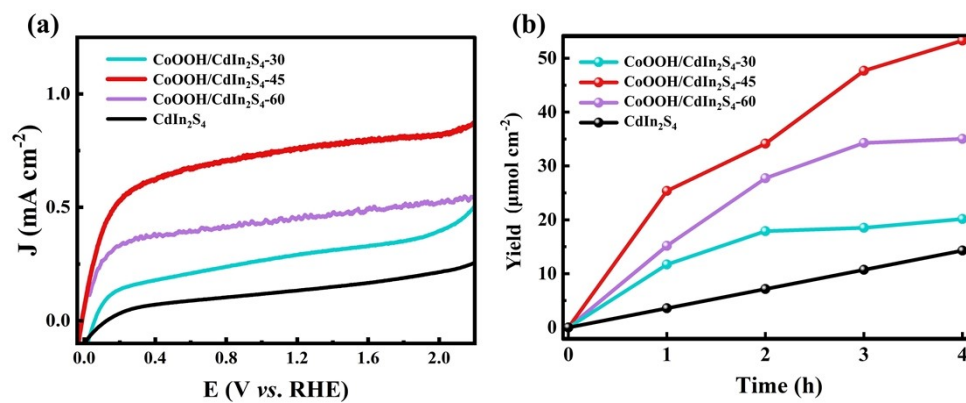

**Fig. S4** (a) LSV curves of CdIn<sub>2</sub>S<sub>4</sub>, CoOOH/CdIn<sub>2</sub>S<sub>4</sub>-30, CoOOH/CdIn<sub>2</sub>S<sub>4</sub>-45 and CoOOH/CdIn<sub>2</sub>S<sub>4</sub>-60 photoanode in benzyl alcohol aqueous electrolyte under AM 1.5 G irradiation; (b) Yield plots of CdIn<sub>2</sub>S<sub>4</sub>, CoOOH/CdIn<sub>2</sub>S<sub>4</sub>-30, CoOOH/CdIn<sub>2</sub>S<sub>4</sub>-45 and CoOOH/CdIn<sub>2</sub>S<sub>4</sub>-60 photoanode for the production of benzaldehyde in benzyl alcohol aqueous electrolyte.

**Table S1** Yield and selectivity of photoanodes for the production of benzaldehyde and benzoic acid in benzyl alcohol aqueous electrolyte during 4 h of reaction.

| Photoanode                                 | Benzaldehyde<br>( $\mu\text{mol cm}^{-2}$ ) | Benzoic acid<br>( $\mu\text{mol cm}^{-2}$ ) | Selectivity for<br>benzaldehyde |
|--------------------------------------------|---------------------------------------------|---------------------------------------------|---------------------------------|
| CdIn <sub>2</sub> S <sub>4</sub>           | 14.28                                       | 7.49                                        | 65.59%                          |
| CoOOH/CdIn <sub>2</sub> S <sub>4</sub> -30 | 20.14                                       | 9.87                                        | 67.11%                          |
| CoOOH/CdIn <sub>2</sub> S <sub>4</sub> -45 | 53.28                                       | 0.46                                        | 99.14%                          |
| CoOOH/CdIn <sub>2</sub> S <sub>4</sub> -60 | 34.04                                       | 11.18                                       | 75.28%                          |

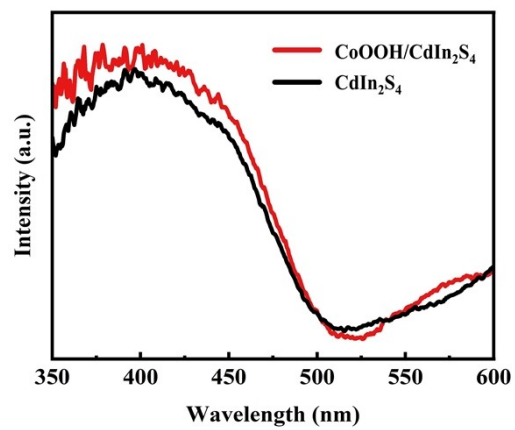

**Fig. S5** UV-vis light absorption spectra of CdIn<sub>2</sub>S<sub>4</sub> and CoOOH/CdIn<sub>2</sub>S<sub>4</sub> film.

**Table S2** The fitted results for the EIS shown in **Fig. 3c**.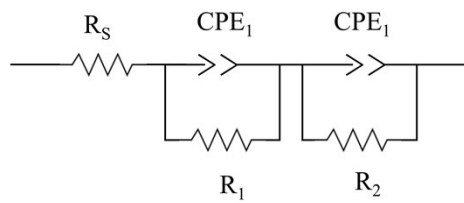

| Sample              | $R_s(\Omega)$ | $CPE_1-T$             | $CPE_1-P$ | $R_1(\Omega)$ | $CPE_2-T$             | $CPE_2-P$ | $R_2(\Omega)$ |
|---------------------|---------------|-----------------------|-----------|---------------|-----------------------|-----------|---------------|
| $CdIn_2S_4$         | 24.39         | $1.47 \times 10^{-4}$ | 0.51      | 538.10        | $2.56 \times 10^{-5}$ | 0.91      | 8259          |
| $CoOOH/Cd_2In_2S_4$ | 23.11         | $1.53 \times 10^{-4}$ | 0.52      | 125.50        | $3.50 \times 10^{-5}$ | 0.72      | 1929          |



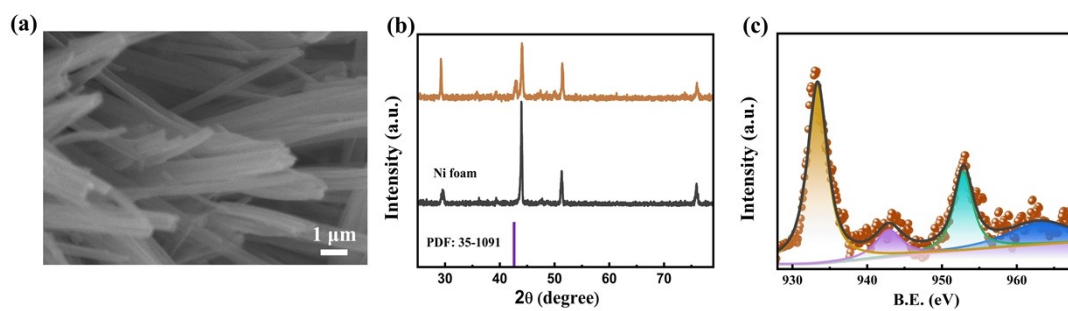

**Fig. S6** SEM, XRD and XPS for Cu<sub>2</sub>O film on Ni foam.

**Table S3** The products in reported tandem PEC cells with Cu<sub>2</sub>O cathode for CO<sub>2</sub> reduction.

| Product                                                                                                  | Photoanode                                       | Photocathode                                     | External bias or not | Reference                                      |
|----------------------------------------------------------------------------------------------------------|--------------------------------------------------|--------------------------------------------------|----------------------|------------------------------------------------|
| <b>C<sub>2</sub>H<sub>5</sub>OH</b>                                                                      | <b>CoOOH/CdIn<sub>2</sub>S<sub>4</sub></b>       | <b>Cu<sub>2</sub>O</b>                           | <b>no</b>            | <b>This work</b>                               |
| HCOOH                                                                                                    | Ti/NtTiO <sub>2</sub> /CuO                       | Cu <sub>2</sub> O/GDL                            | no                   | <i>ChemSusChem.</i> , 2019, 12, 4274.          |
| CO                                                                                                       | Si                                               | Ag                                               | yes                  | <i>Nat Commun.</i> , 2022, 13, 7111.           |
| CO, H <sub>2</sub>                                                                                       | IrO <sub>x</sub> /a-Si                           | CoPc/CNT-C-CsFAPb(I <sub>Br</sub> ) <sub>3</sub> | no                   | <i>Adv. Energy Mater.</i> , 2020, 10, 2002105. |
| CO, H <sub>2</sub>                                                                                       | CH <sub>3</sub> NH <sub>3</sub> PbI <sub>3</sub> | ZnO@ZnTe@CdTe-Au                                 | no                   | <i>ACS Nano.</i> , 2016, 10, 6980.             |
| HCOOH                                                                                                    | NiOOH/ $\alpha$ -Fe <sub>2</sub> O <sub>3</sub>  | Bi/GaN/Si                                        | yes                  | <i>Nat Commun.</i> , 2023, 14, 1013.           |
| HCOOH                                                                                                    | mTiO <sub>2</sub>                                | mITO                                             | no                   | <i>Nat Synth.</i> , 2022, 1, 77.               |
| HCOOH                                                                                                    | PVK IOTiO <sub>2</sub>  FDH                      | BiVO <sub>4</sub>                                | no                   | <i>Joule.</i> , 2021, 5, 2771.                 |
| CO, HCOOH                                                                                                | BiVO <sub>4</sub>                                | Cu-In                                            | yes                  | <i>Chem. Eng. J.</i> , 2019, 355, 1.           |
| C <sub>2</sub> H <sub>5</sub> OH, C <sub>2</sub> H <sub>4</sub>                                          | Si                                               | Cu                                               | yes                  | <i>Nat Commun.</i> , 2022, 13, 7111.           |
| CH <sub>3</sub> OH,<br>CH <sub>3</sub> OH,<br>C <sub>2</sub> H <sub>5</sub> OH,<br>CH <sub>3</sub> COOH, | TNT                                              | Pt/GA/CF                                         | yes                  | <i>Chem. Eng. J.</i> , 2017, 322, 22.          |

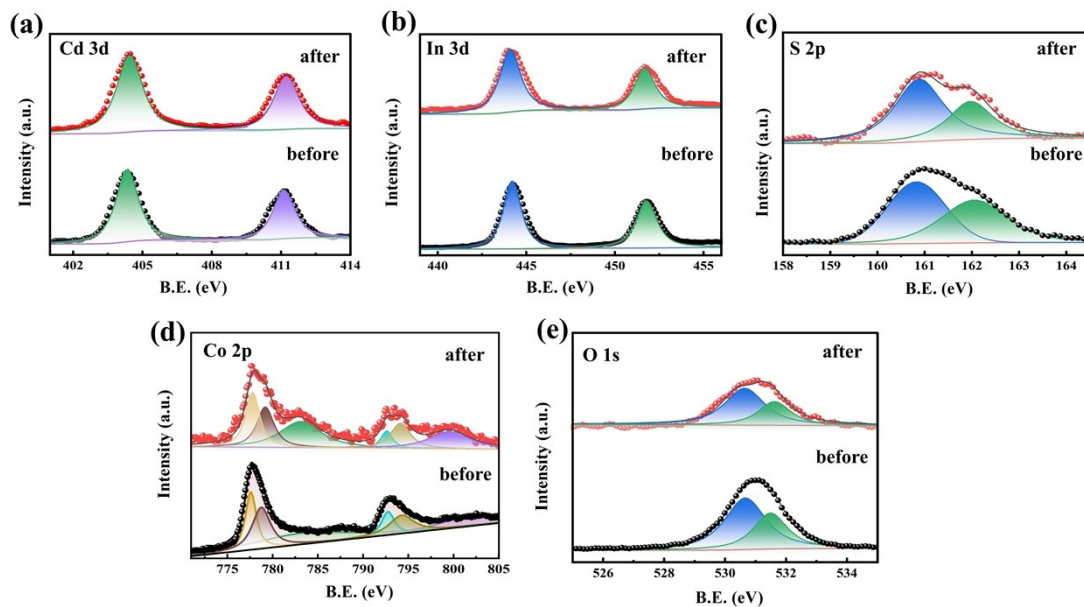

**Fig. S7** XPS spectra of CoOOH/CdIn<sub>2</sub>S<sub>4</sub> photoanode before and after 4 h of testing.
